# Supplementary material for: Site-selective growth of metal–organic frameworks using an interfacial growth approach combined with VUV photolithography
Source: Royal Society of Chemistry journal article supplement (doi:10.1039/c6ra18340a), 2016-01-01
Supplement: c6ra18340a1.pdf [file c6ra18340a1.pdf]

## Supplementary Information

### **Site-selective growth of metal-organic frameworks using an interfacial growth approach combined with VUV photolithography**

Takaaki Tsuruoka,\* Tetsuhiro Matsuyama, Ayumi Miyanaga, Takashi Ohhashi, Yohei Takashima, and Kensuke Akamatsu\*

*Department of Nanobiochemistry, Frontiers of Innovative Research in Science and Technology (FIRST),  
Konan University, 7-1-20 Minatojimaminami, Chuo-ku, Kobe 650-0047, Japan*

#### Contents:

1. Experimental Procedure
2. AFM Analysis of PMMA Resist Pattern
3. XRD Pattern of  $[\text{Cu}_2(\text{ndc})_2(\text{dabco})]_n$  Crystals
4. XRD Pattern of MIL-53 (Al) Crystals
5. EDX Mapping Image of  $[\text{Cu}_2(\text{ndc})_2(\text{dabco})]_n$  Crystals
6. XRD Pattern and EDX Mapping Image of  $[\text{Tb}_2(\text{bdc})_3(\text{H}_2\text{O})_4]_n$  Crystals

## 1. Experimental procedure

### *Materials:*

Potassium hydroxide, copper nitrate trihydrate, aluminum chloride, 1,4-naphthalenedicarboxylic acid, 1,4-diazabicyclo[2.2.2]octane, 1,4-benzenedicarboxylic acid, and disodium 1,4-dicarboxylate were purchased from Wako Chemicals Ltd. Terbium nitrate hexahydrate, 1-butanol, and ethanol were purchased from Kanto Chemical Ltd. All chemicals were used as-received. Pyromellitic dianhydride oxydianiline (PMDA-ODA) type polyimide films (50  $\mu\text{m}$  thick, Kapton 200H, Toray-Du Pont Co. Ltd.) were used as polymer substrates. The films were cleaned prior to use by ultrasonication in ethanol at room temperature for 5 min.

### *Construction of MOF crystals:*

The ion-doped polymer films with PMMA resist patterns were immersed into reaction solutions (5 mL) of organic ligands ( $[\text{Cu}_2(\text{ndc})_2(\text{dabco})]_n$  framework: 1-butanol solution of 1,4-naphthalenedicarboxylic acid (10 mM) and 1,4-diazabicyclo[2.2.2]octane (5 mM), MIL-53 (Al) framework: aqueous solution of 1,4-benzenedicarboxylic acid (10 mM), and  $[\text{Tb}_2(\text{bdc})_3(\text{H}_2\text{O})_4]_n$  framework: aqueous solution of disodium 1,4-benzenedicarboxylate (10 mM)), followed by heating for 1 h at 200  $^{\circ}\text{C}$  with microwave irradiation (Initiator+; Biotage).

### *Characterization*

AFM image of the obtained samples was collected by atomic force microscopy (AFM; VN-8000, KEYENCE). The surface morphology and thickness of the obtained MOF crystals were observed by scanning electron microscopy (SEM; JSM-7001FA, JEOL). X-ray diffraction data were collected on a Rigaku RINT-2200 Right System (Ultima IV) diffractometer with  $\text{CuK}\alpha$  radiation. Elemental analysis of the obtained samples was performed using SEM equipped with an energy-dispersive X-ray (EDX) microanalyzer operating at 15 kV. Emission and excitation spectra were recorded using a spectrofluorometer (FP-6500, Jasco). Fluorescence image was obtained by fluorescence microscope (BX51, Olympus).

## 2. AFM Analysis of PMMA Resist Pattern

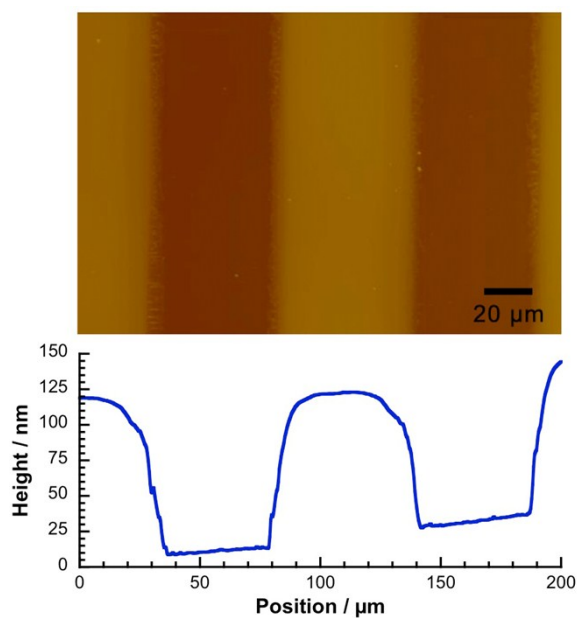

**Figure S1.** AFM image and height profile of PMMA pattern on the substrate.

## 3. XRD Pattern of $[\text{Cu}_2(\text{ndc})_2(\text{dabco})]_n$ Crystals

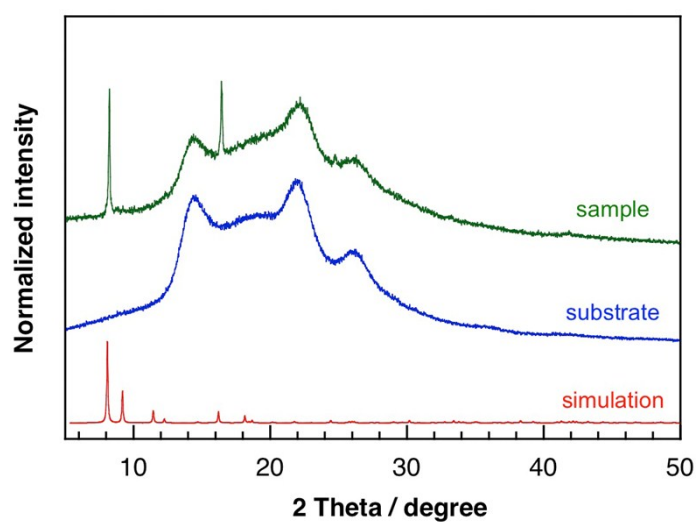

**Figure S2.** XRD pattern of  $[\text{Cu}_2(\text{ndc})_2(\text{dabco})]_n$  crystals on a PMDA-ODA polyimide substrate with PMMA resist patterns.

#### 4. XRD Pattern of MIL-53 (Al) Crystals

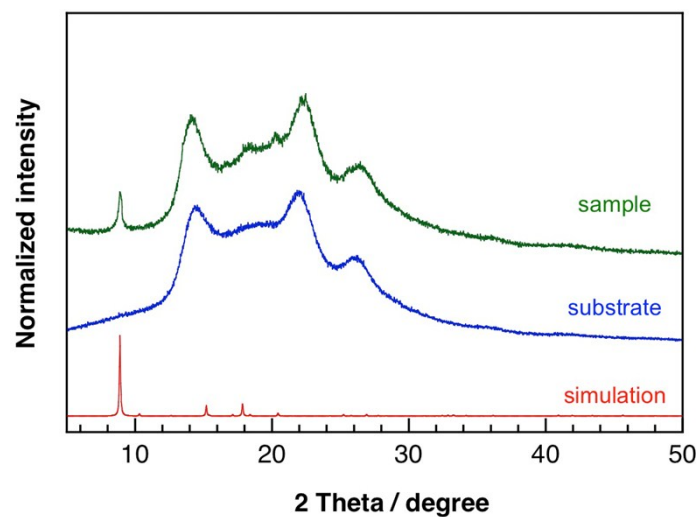

**Figure S3.** XRD pattern of MIL-53 (Al) crystals on a PMDA-ODA polyimide substrate with PMMA resist patterns.

#### 5. EDX Mapping Image of $[\text{Cu}_2(\text{ndc})_2(\text{dabco})]_n$ Crystals

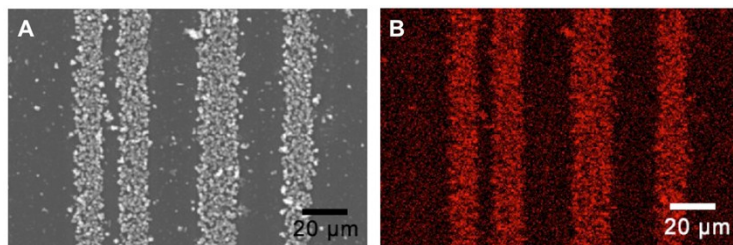

**Figure S4.** EDX mapping of Cu element (red color) of  $[\text{Cu}_2(\text{ndc})_2(\text{dabco})]_n$  crystals on a PMDA-ODA polyimide substrate with PMMA resist patterns.

## 6. XRD Pattern and EDX Mapping Image of $[\text{Tb}_2(\text{bdc})_3(\text{H}_2\text{O})_4]_n$ Crystals

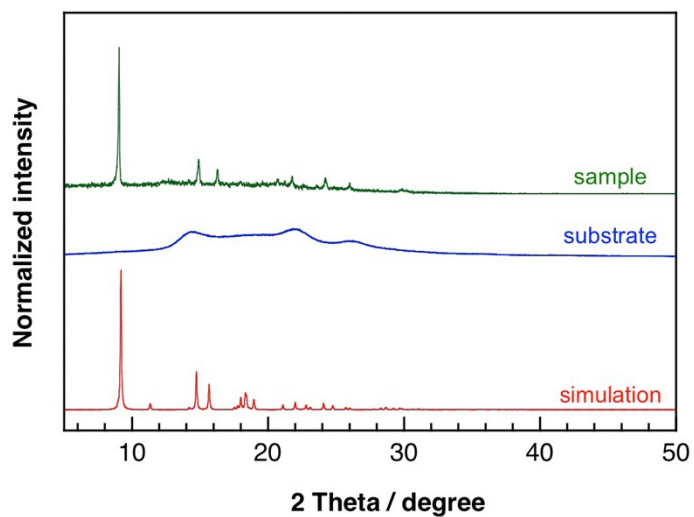

**Figure S5.** XRD pattern of  $[\text{Tb}_2(\text{bdc})_3(\text{H}_2\text{O})_4]_n$  crystals on a PMDA-ODA polyimide substrate.

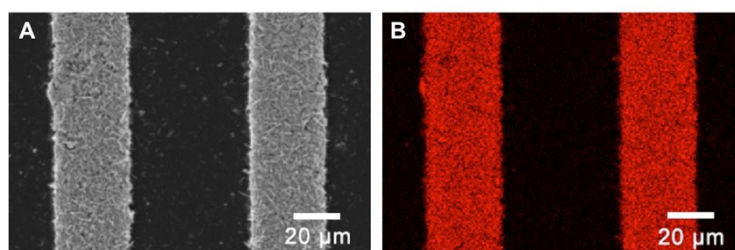

**Figure S6.** EDX mapping of Tb element (red color) of  $[\text{Tb}_2(\text{bdc})_3(\text{H}_2\text{O})_4]_n$  crystals on a PMDA-ODA polyimide substrate with PMMA resist patterns.
